# Supplementary material for: A Combined Targeted and Whole Exome Sequencing Approach Identified Novel Candidate Genes Involved in Heritable Pulmonary Arterial Hypertension
Source: PubMed Central journal article supplement (PMC6345742; doi:10.1038/s41598-018-37277-0), 2019-01-24
Supplement: 41598_2018_37277_MOESM1_ESM.pdf [file 41598_2018_37277_MOESM1_ESM.pdf]

# **A combined targeted and whole exome sequencing approach identified novel candidate genes involved in heritable pulmonary arterial hypertension**

Chiara Barozzi<sup>1#</sup>, Margherita Galletti<sup>1#</sup>, Luciana Tomasi<sup>1</sup>, Sara De Fanti<sup>2</sup>, Massimiliano Palazzini<sup>1</sup>,  
Alessandra Manes<sup>1</sup>, Marco Sazzini<sup>2\*</sup>, Nazzareno Galie<sup>1,3</sup>

<sup>1</sup>Department of Experimental, Diagnostic and Specialty Medicine, University of Bologna, Italy

<sup>2</sup>Department of Biological, Geological and Environmental Sciences, Laboratory of Molecular Anthropology & Centre for Genome Biology, University of Bologna, Italy

<sup>3</sup>National Institute of Biostructures and Biosystems (NIBB), Rome, Italy

<sup>#</sup>These authors contributed equally to this work

\*corresponding author (e-mail: marco.sazzini2@unibo.it)

## **Supplementary Information**

Includes Supplementary Figures S1-S3, Legends of Supplementary Tables, Supplementary References.

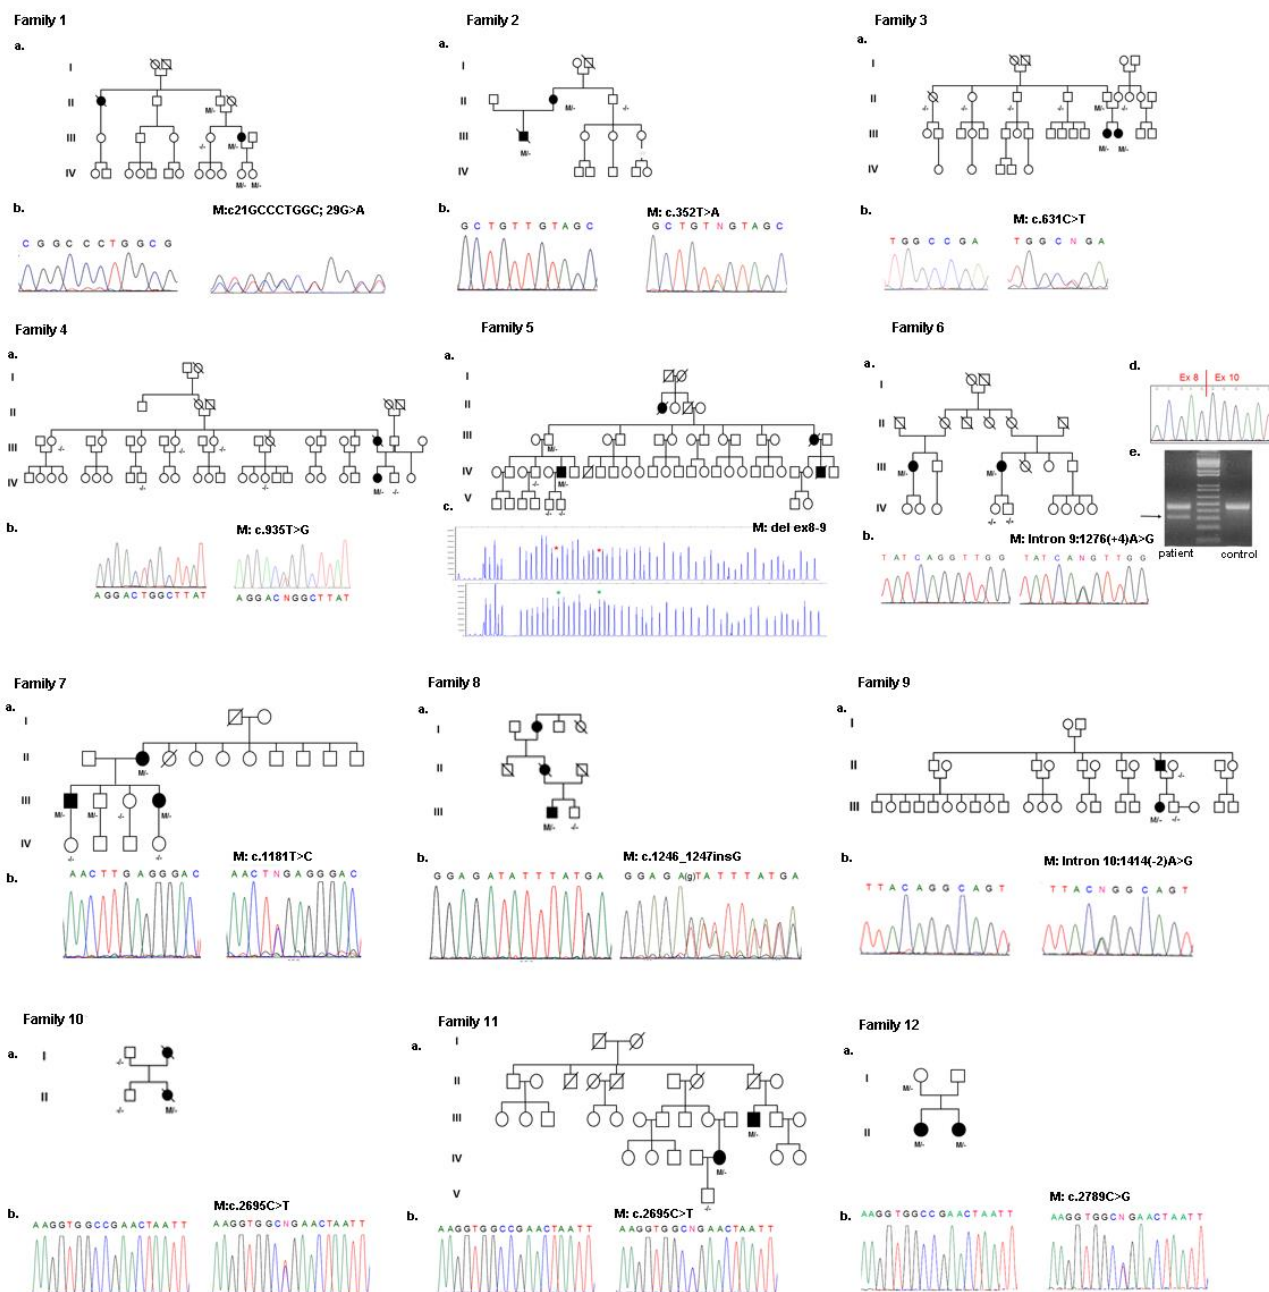

**Supplementary Fig. S1. Pedigrees of 12 families with HPAH and details of detected *BMP2* mutations.** a) Pedigrees of 12 HPAH families carrying *BMP2* mutations. Unaffected male □ female ○; affected male ■ female ●; Deceased ☒. M, mutated allele; –, wild type allele. b) Sanger chromatograms for the identified variants. A, adenine; C, cytosine; G, guanine; T, thymine; N, variant. c) MLPA fragment analysis. \* Amplicons showing reduced dosage in patients. \* Amplicons dosage in control pool. d) Sanger chromatograms of *BMP2* transcript showing exon 9 skipping. e) Cropped image of acrylamide gel showing the aberrant transcript due to the occurrence of a splice site mutation (full-length image of the gel is provided as Supplementary Figure S3).

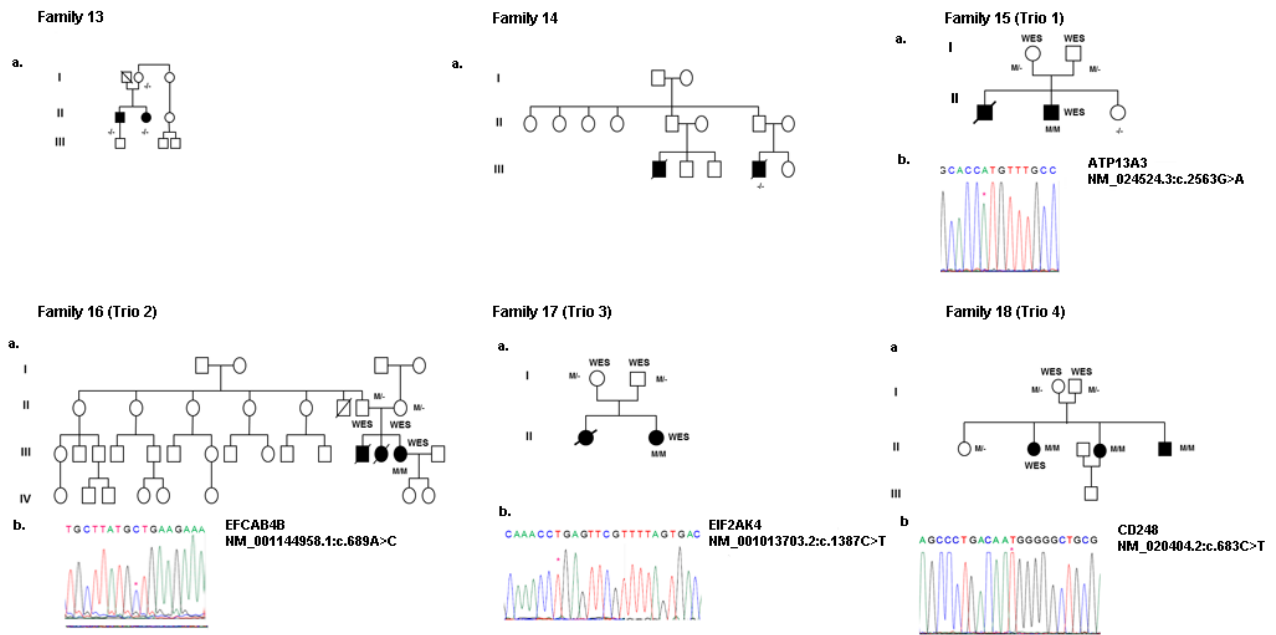

**Supplementary Fig. S2. Pedigrees of six families with HPAH and details of related candidate-gene mutations.** a) Pedigrees of six HPAH families showing no *BMPR2* mutations. Unaffected male □ female ○ ; affected male ■ female ● ; Deceased ☒ . M, mutated allele; –, wild type allele. WES, subjects submitted to trio-Whole exome sequencing. b) Sanger chromatograms of identified variants. A, adenine; C, cytosine; G, guanine; T, thymine; \* variant.

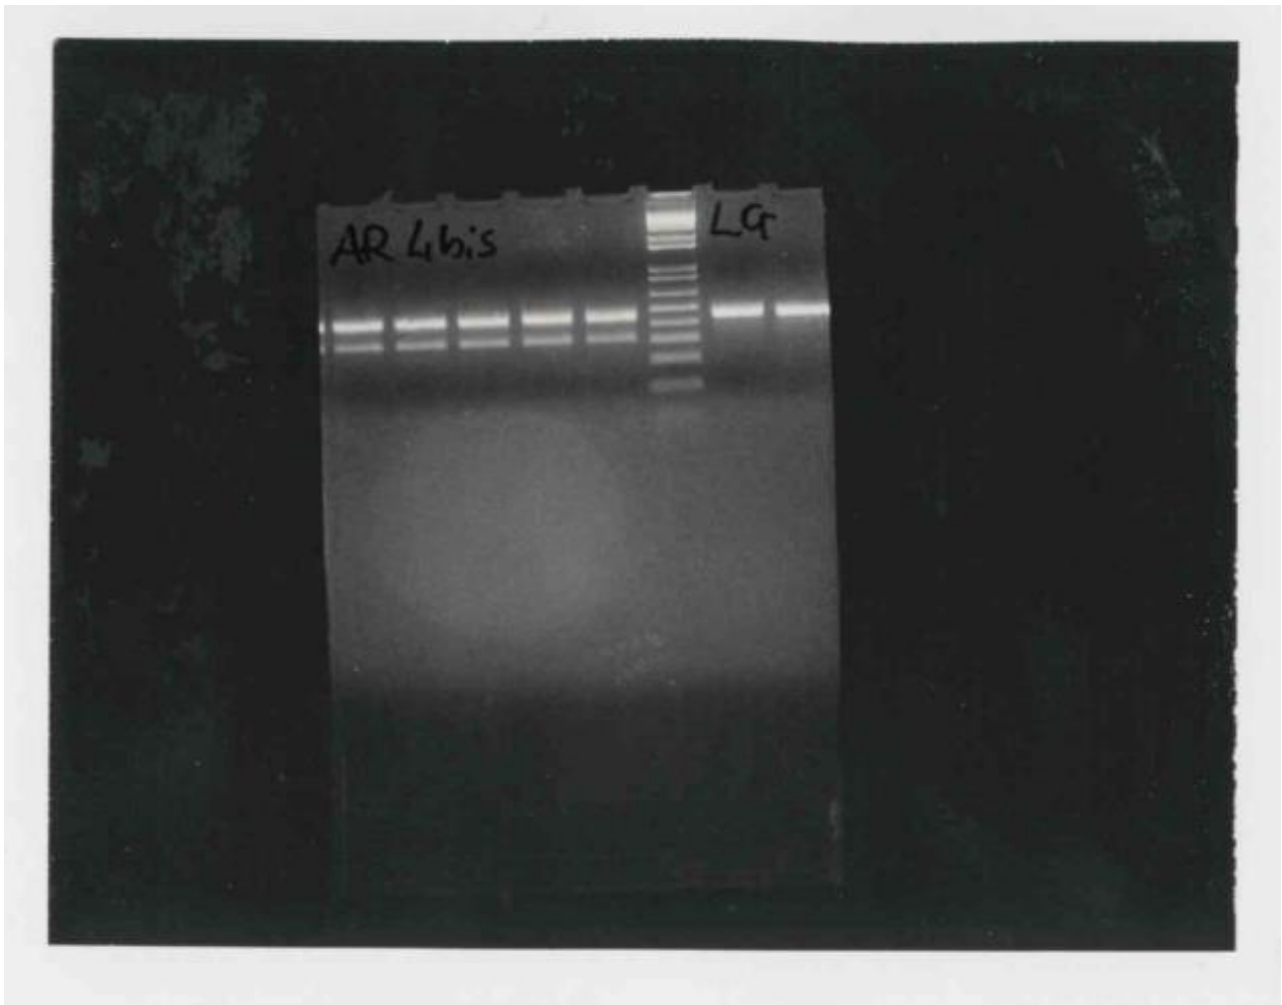

**Supplementary Fig. S3. Full-length image of the electrophoresis gel whose detail was reported in Supplementary Fig. S1 (family 6, image e).** Individuals showing the aberrant transcript due to the occurrence of a splice site mutation are those presenting two DNA fragments. Control individuals are instead displayed on the right with respect to the DNA size marker and present a single DNA fragment.

## Supplementary Tables

Supplementary Tables S1-S4 are included in a separate Excel file.

**Supplementary Table S1.** Family information and clinical parameters at diagnosis for the 28 HPAH patients included in the study and belonging to 18 families.

**Supplementary Table S2.** Details of the 26 variants detected via Trio-WES and validated by means of Sanger sequencing.

**Supplementary Table S3.** Reads depth and ratio of variant reads for genes prioritized via Trio-WES.

**Supplementary Table S4.** Enrichment analyses performed on genomic regions affected by SNVs and INDELs identified via WES and having passed stringent filtering.

## Supplementary References

1. Machado RD, Aldred MA, James V, Harrison RE, Patel B, Schwalbe EC, et al. Mutations of the TGF-beta type II receptor BMPR2 in pulmonary arterial hypertension. *Hum Mutat.* 2006; **27**(2):121-132.
2. Thomson JR, Machado RD, Pauciulo MW, Morgan NV, Humbert M, Elliott GC, et al. Sporadic primary pulmonary hypertension is associated with germline mutations of the gene encoding BMPR-II, a receptor member of the TGF-beta family. *J Med Genet.* 2000; **37**(10):741-745.
3. Aldred MA, Vijaykrishnan J, James V, Soubrier F, Gomez-Sanchez MA, Martensson G, et al. BMPR2 gene rearrangements account for a significant proportion of mutations in familial and idiopathic pulmonary arterial hypertension. *Hum Mutat.* 2006; **27**(2):212-213.
4. Lane KB, Machado RD, Pauciulo MW, Thomson JR, Phillips JA, 3rd, Loyd JE, et al. Heterozygous germline mutations in BMPR2, encoding a TGF-beta receptor, cause familial primary pulmonary hypertension. *Nat Genet.* 2000; **26**(1):81-84.
5. Morisaki H, Nakanishi N, Kyotani S, Takashima A, Tomoike H, Morisaki T. BMPR2 mutations found in Japanese patients with familial and sporadic primary pulmonary hypertension. *Hum Mutat.* 2004; **23**(6):632.
